# Supplementary material
Source: publisher figshare collection journal article supplement (https://geolsoc.figshare.com/articles/dataset/_/3453422)
Supplement: Supplementary file 1 [file 1]

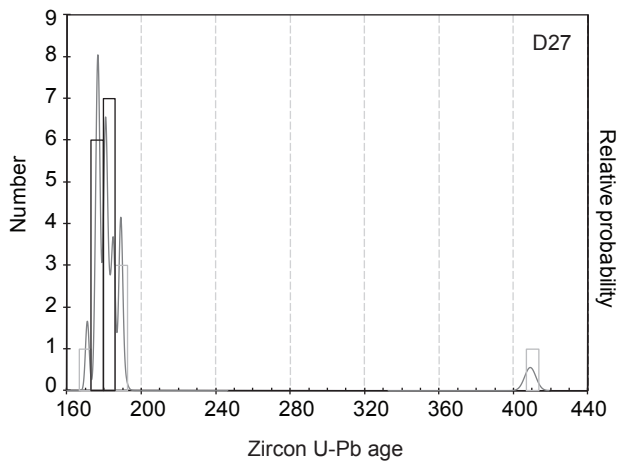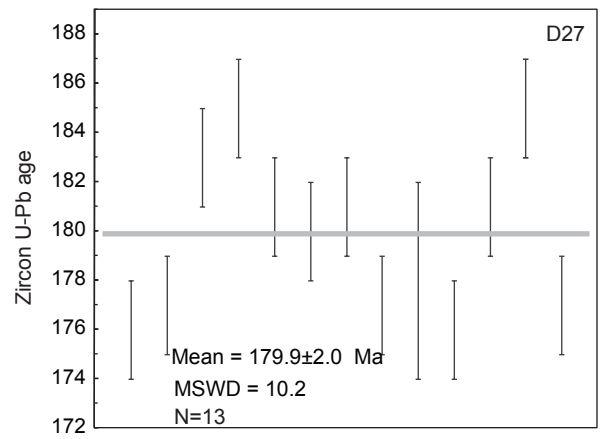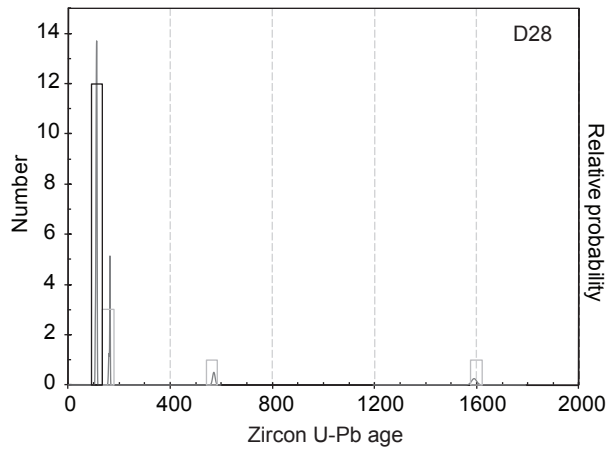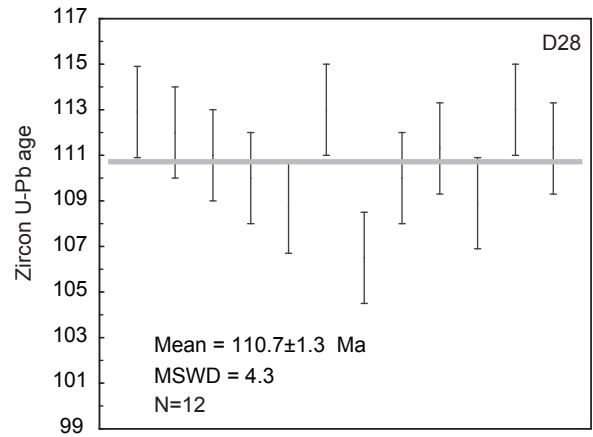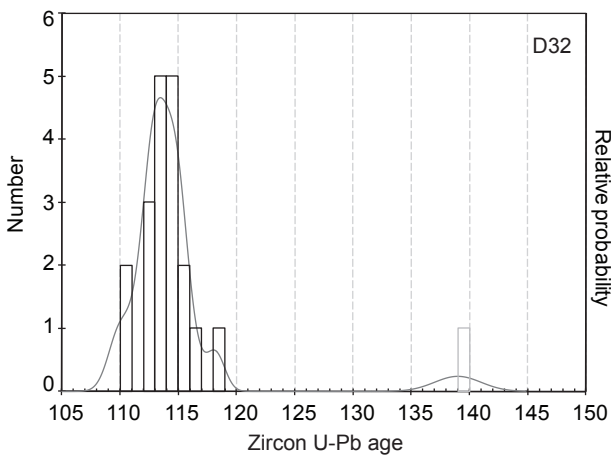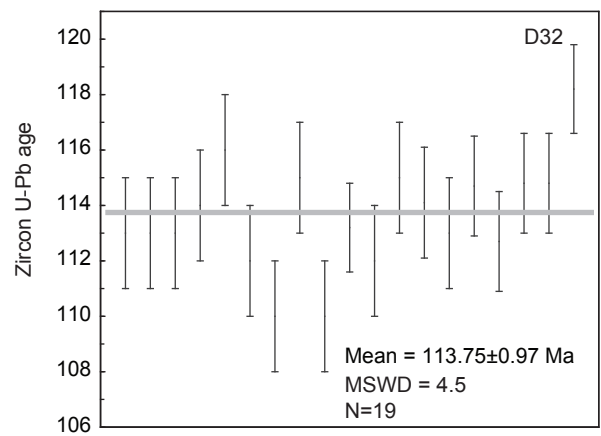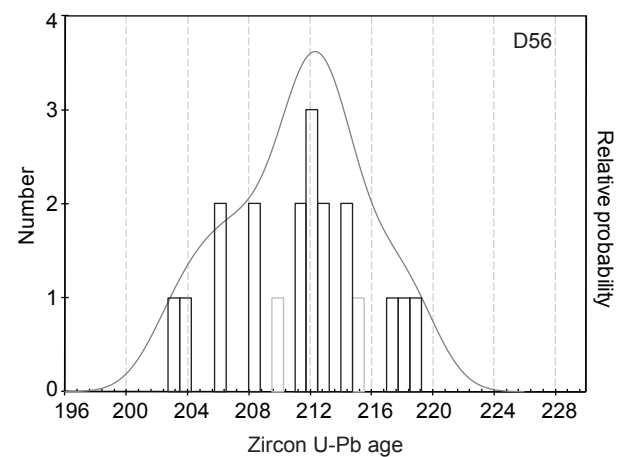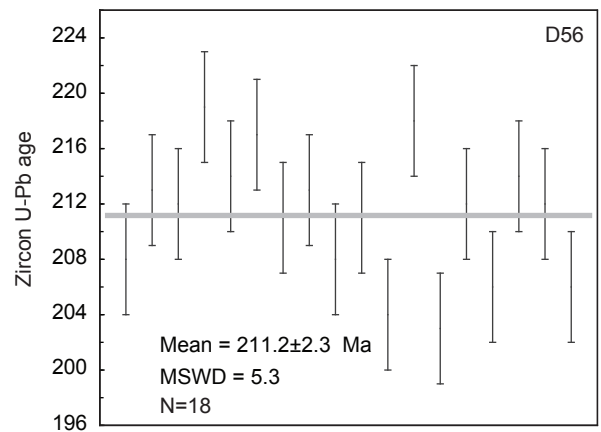

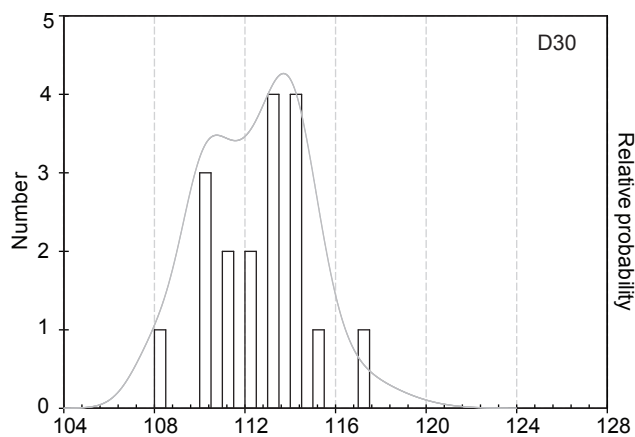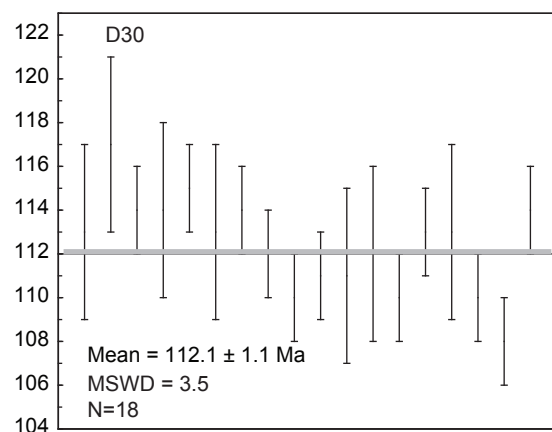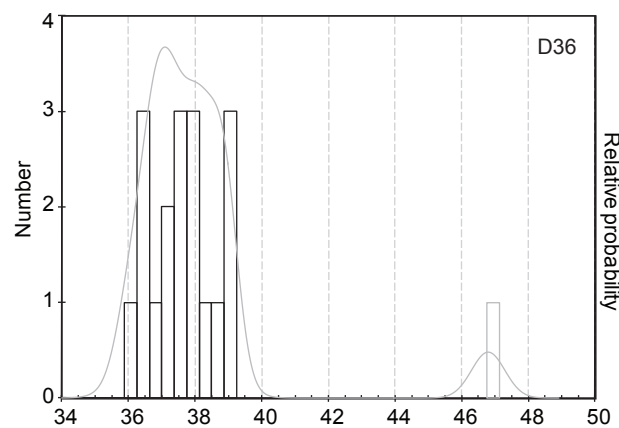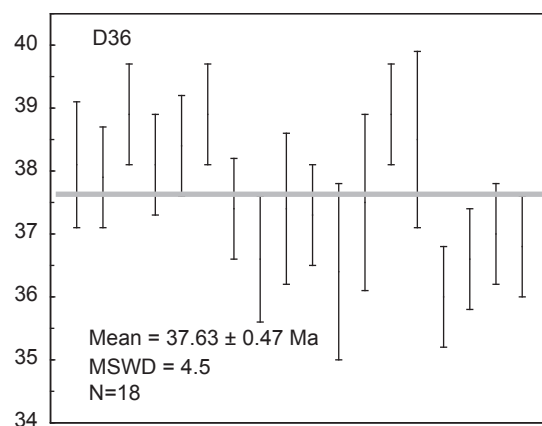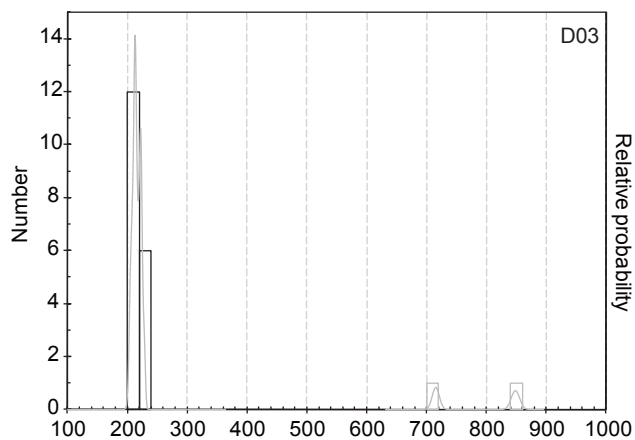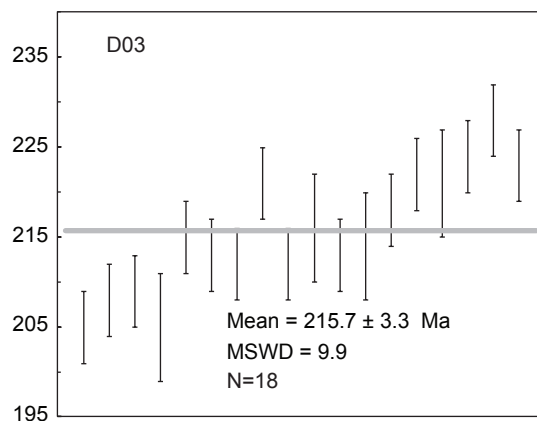

Fig. S1 Probability and weighted average of  $^{206}\text{Pb}/^{238}\text{U}$  ages for representative sample D27, D28, D32, D56, D30, D36, and D03. Gray box in the probability diagram represents samples that plot outside of a Gaussian distribution, and they were excluded from the weighted mean age calculation. Gray bar in the weighted average plot represents the mean age.
