# Supplementary material
Source: publisher figshare collection journal article supplement (https://geolsoc.figshare.com/articles/dataset/_/3453422)
Supplement: Supplementary file 2 [file 1]

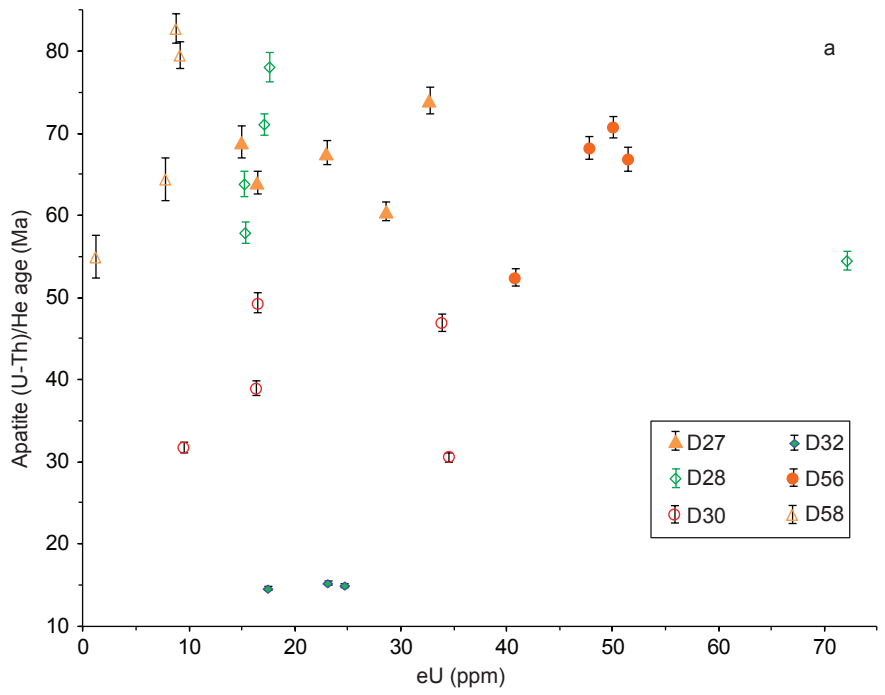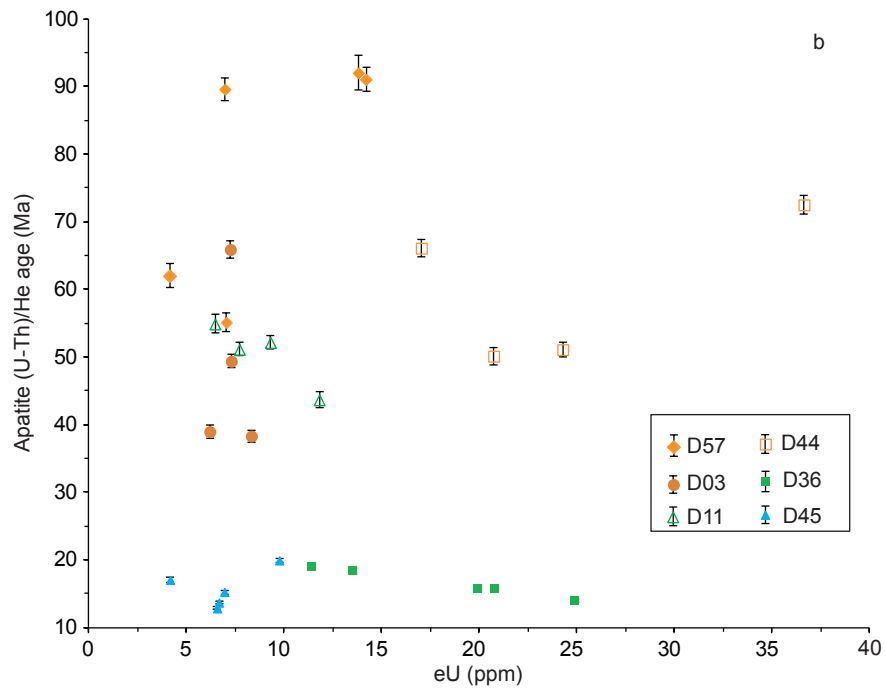

Fig. S2. Mean apatite (U-Th)/He age versus mean sample apatite eU (effective U concentration:  $U+0.235 \cdot Th$ ) for our samples. The errors plotted are 1-sigma standard deviation of individual grain ages. Sample D56 show some positive correlations between apatite (U-Th)/He age and eU.
